# Supplementary material for: Effects of various Cu(0), Fe(0), and proanthocyanidin reducing agents on Fe(iii)-catalysed ATRP for the synthesis of PMMA block copolymers and their self-assembly behaviours
Source: Royal Society of Chemistry journal article supplement (doi:10.1039/d0py00658k), 2020-01-01
Supplement: d0py00658k1.pdf [file d0py00658k1.pdf]

## Supporting Information

# Effects of Various Cu(0), Fe(0), and Proanthocyanidins Reducing Agents on Fe(III)-Catalysed ATRP to the Synthesis of PMMA Block Copolymers and Their Self-assembly Behaviours

Yi-Shen Huang<sup>†a</sup>, Han-Yu Hsueh<sup>†b</sup>, Junko Aimi<sup>c</sup>, Li-Chieh Chou<sup>a</sup>, Yu-Chi Lu<sup>a</sup>, Shiao-Wei Kuo<sup>d,e</sup>, Chung-Chi Wang<sup>f</sup>, Kuo-Yu Chen<sup>\*g</sup> and Chih-Feng Huang<sup>\*a</sup>

<sup>a</sup>Department of Chemical Engineering, i-Center for Advanced Science and Technology (iCAST), National Chung Hsing University, 145 Xingda Road, South District, Taichung 40227, Taiwan.

<sup>b</sup>Department of Materials Science and Engineering, National Chung Hsing University, Taichung 40227, Taiwan.

<sup>c</sup>Molecular Design & Function Group, Research Center for Functional Materials, National Institute for Materials Science, 1-2-1 Sengen, Tsukuba, Ibaraki 305-0047, Japan.

<sup>d</sup>Department of Materials and Optoelectronic Science, Center of Crystal Research, National Sun Yat-Sen University, Kaohsiung 80424, Taiwan.

<sup>e</sup>Department of Medicinal and Applied Chemistry, Kaohsiung Medical University, Kaohsiung 80708, Taiwan.

<sup>f</sup>Division of Cardiovascular Surgery, Veterans General Hospital, Taichung, Taiwan.

<sup>g</sup>Department of Chemical and Materials Engineering, National Yunlin University of Science and Technology, Yunlin 64002, Taiwan.

\* Correspondence: [chenkuo@yuntech.edu.tw](mailto:chenkuo@yuntech.edu.tw) and [HuangCF@dragon.nchu.edu.tw](mailto:HuangCF@dragon.nchu.edu.tw)

**Captions:**

Figure S1. Kinetics of Cu(II)-catalyzed ARGET ATRP (a) with and (b) without PC at 60 °C (MMA/EBiB/PC/CuBr<sub>2</sub>/PMDETA = 500/1/0.5/0.1/1 in anisole; [MMA]<sub>0</sub> = 4.5 M).

Figure S2. Kinetics of Cu(II)-catalyzed ATRP with different M/I ratios in the presence of PC (MMA/EBiB/PC/CuBr<sub>2</sub>/PMDETA = 100 (or 500)/1/0.1/0.5/1 in anisole; [MMA]<sub>0</sub> = 4.5 M).

Figure S3. GPC traces of Cu(II)-catalyzed ATRP with different M/I ratios in the presence of PC (MMA/EBiB/CuBr<sub>2</sub>/PC/PMDETA = 100 (or 500)/1/0.1/0.5/1 in anisole; [MMA]<sub>0</sub> = 4.5 M).

Figure S4. Kinetics of ATRP of MMA without degassing using (a) Cu(0) and (b) PC as RAs (MMA/EBiB/RA/FeCl<sub>3</sub>/PPh<sub>3</sub> = 200/1/5/0.1/0.5 in anisole; [MMA]<sub>0</sub> = 4.5 M).

Figure S5. FT-IR spectra (4000–400 cm<sup>-1</sup>) of (a) PMMA-*b*-PBzMA and (b) PMMA-*b*-PBMA block copolymers.

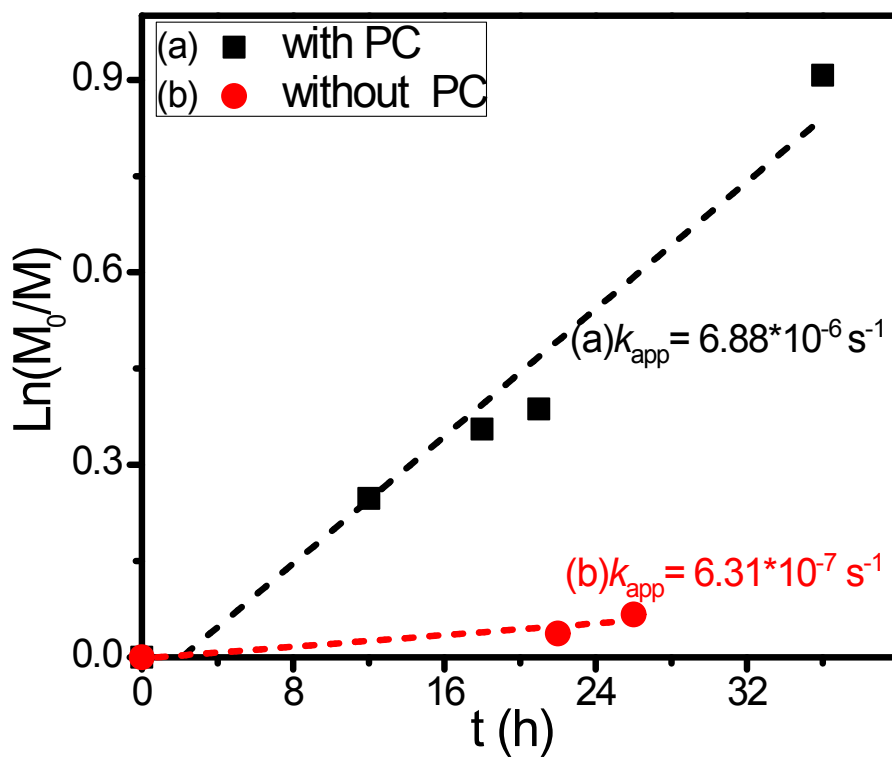

Figure S1. Kinetics of Cu(II)-catalyzed ARGET ATRP (a) with and (b) without PC at 60 °C (MMA/EBiB/PC/CuBr<sub>2</sub>/PMDETA = 500/1/0.5/0.1/1 in anisole; [MMA]<sub>0</sub> = 4.5 M).

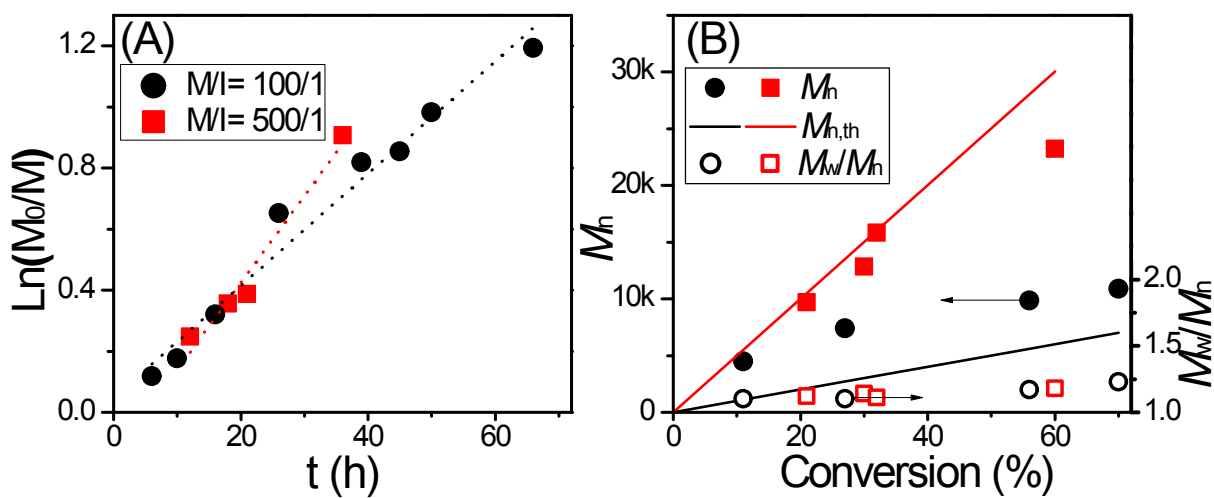

Figure S2. Kinetics of Cu(II)-catalyzed ATRP with different M/I ratios in the presence of PC (MMA/EBiB/PC/CuBr<sub>2</sub>/PMDETA = 100 (or 500)/1/0.5/0.1/1 in anisole; [MMA]<sub>0</sub> = 4.5 M).

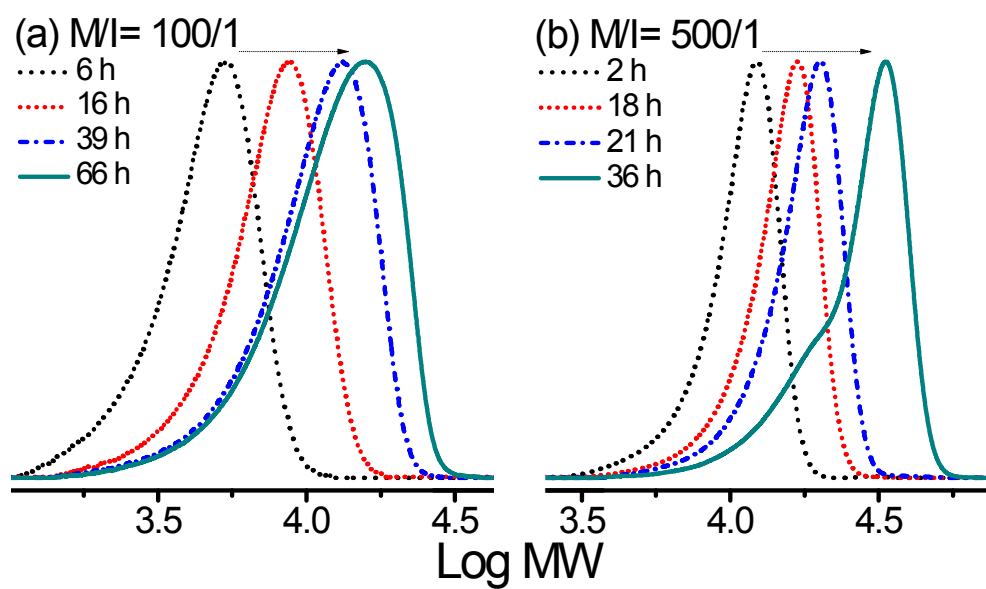

Figure S3. GPC traces of Cu(II)-catalyzed ATRP with different M/I ratios in the presence of PC (MMA/EBiB/PC/CuBr<sub>2</sub>/PMDETA = 100 (or 500)/1/0.5/0.1/1 in anisole; [MMA]<sub>0</sub> = 4.5 M).

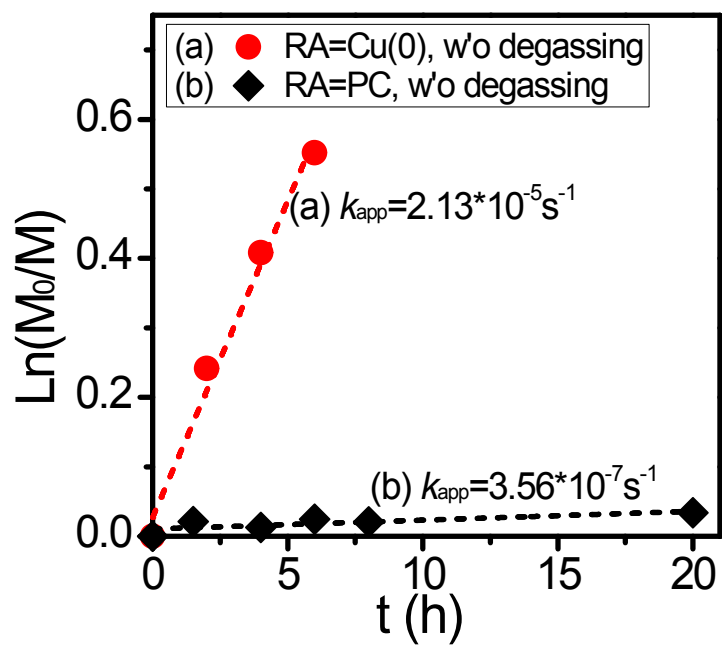

Figure S4. Kinetics of ATRP of MMA without degassing using (a) Cu(0) and (b) PC as RAs (MMA/EBiB/RA/FeCl<sub>3</sub>/PPh<sub>3</sub> = 200/1/5/0.1/0.5 in anisole; [MMA]<sub>0</sub> = 4.5 M).

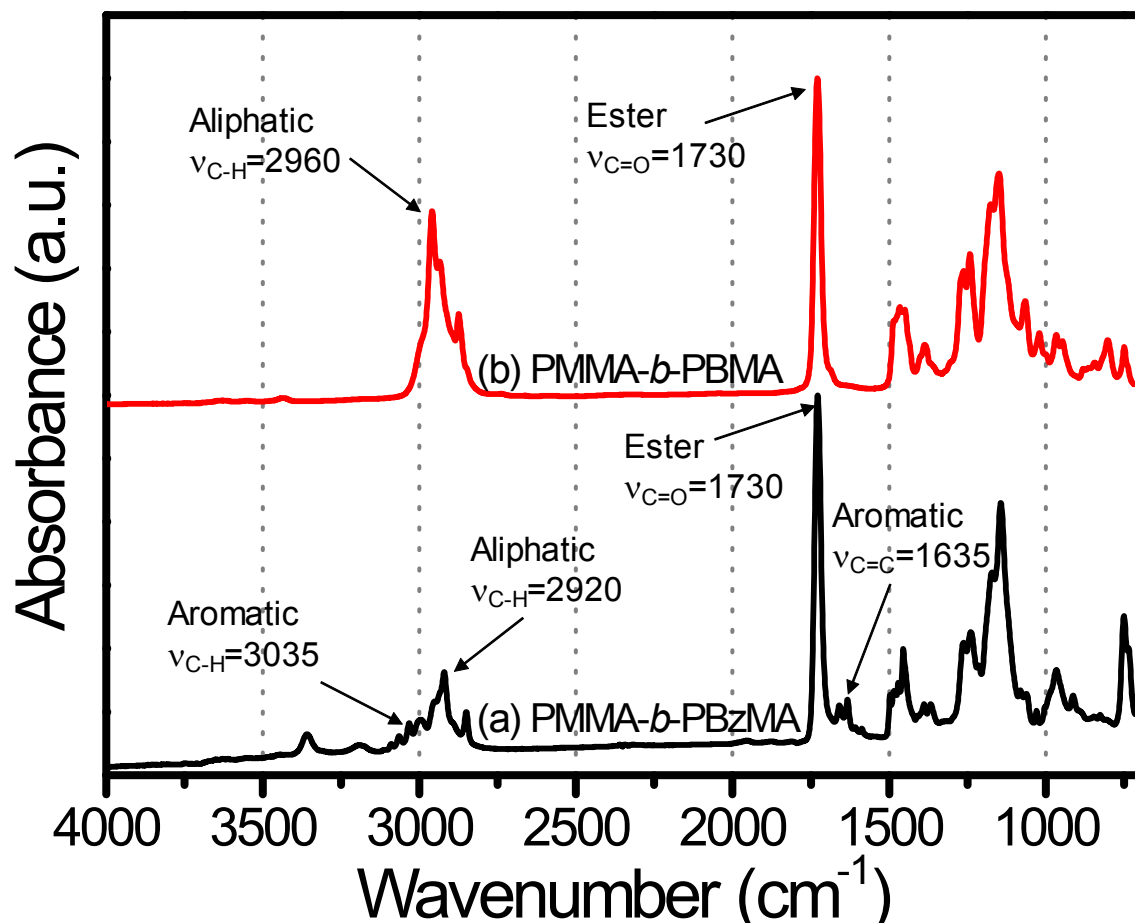

Figure S5. FT-IR spectra (4000–400 cm<sup>-1</sup>) of (a) PMMA-*b*-PBzMA and (b) PMMA-*b*-PBMA block copolymers.
